# Supplementary material for: Novel Prognostic Stratification and Therapeutic Implications in T1N0M0 Breast Cancer: Insights from a Multi-Center Chinese Cohort
Source: Research Square preprint supplement (doi:10.21203/rs.3.rs-6348915/v1), 2025-05-09
Supplement: Supplementary file 1 [file 0e211a363d590205213a3038.docx]

Table 3. Hazard Ratios Quantifying the Multivariate Associations between Patients, Tumor, and Treatment Characteristics and Breast Cancer Events in HER2+ (T<8 mm) Breast Cancer and HER2+ (≥8 mm) Breast Cancer.

|  | **DFS** | | | | **DRFS** | | | | **BCSS** | | | | **OS** | | | |
| --- | --- | --- | --- | --- | --- | --- | --- | --- | --- | --- | --- | --- | --- | --- | --- | --- |
| **Variables** | **＜8 mm** | | **≥8 mm** | | **＜8 mm** | | **≥8 mm** | | **＜8 mm** | | **≥8 mm** | | **＜8 mm** | | **≥8 mm** | |
|  | **HR**  **(95% CI)** | ***P*** | **HR**  **(95% CI)** | ***P*** | **HR**  **(95%CI)** | ***P*** | **HR**  **(95% CI)** | ***P*** | **HR**  **(95% CI)** | ***P*** | **HR**  **(95% CI)** | ***P*** | **HR**  **(95% CI)** | ***P*** | **HR**  **(95% CI)** | ***P*** |
| **Age, years** |  |  |  |  |  |  |  |  |  |  |  |  |  |  |  |  |
| ≤ 60 | _ | _ | 1.00 (reference) |  | _ | _ | 1.00 (reference) |  | _ | _ | 1.00 (reference) |  | 1.00 (reference) |  | 1.00 (reference) |  |
| > 60 | _ | _ | 1.04  (0.44 - 2.19) | .92 | _ | _ | 1.01  (0.40 - 2.22) | 0.98 | _ | _ | 1.46  (0.56 -3.39) | .40 | 10.06  (1.06-218.70) | .06 | 4.68  (2.51 - 8.85) | .001 |
| **Menopausal status** |  |  |  |  |  |  |  |  |  |  |  |  |  |  |  |  |
| Premenopause | 1.00 (reference) |  | 1.00 (reference) |  | 1.00 (reference) |  | 1.00 (reference) |  | 1.00 (reference) |  | 1.00 (reference) |  | 1.00 (reference) |  | 1.00 (reference) |  |
|  |  |  |  |  |  |  |  |  |  |  |  |  |  |  |  |  |
| Postmenopause | 0.80  (0.22 - 2.93) | 0.72 | 0.68  (0.42 - 1.06) | .10 | 0.50  (0.01-2.09) | 0.35 | 0.69  (0.42-1.11) | .14 | 0.20  (0.01- 1.43) | .16 | 0.58  (0.32 - 1.00) | .06 | 0.20  (0.01 - 1.39) | .15 | 0.59  (0.33 - 1.03) | .07 |
| **Histological grade** |  |  |  |  |  |  |  |  |  |  |  |  |  |  |  |  |
| other | 1.00 (reference) |  | 1.00 (reference) |  | 1.00 (reference) |  | 1.00 (reference) |  | 1.00 (reference) |  | 1.00 (reference) |  | 1.00 (reference) |  | 1.00 (reference) |  |
| III | 8.88  (2.488 - 35.37) | <.001 | 1.96  (1.28 - 3.05) | .002 | 6.14  (1.42 - 26.59) | .012 | 1.57  (1.01 - 2.49) | .048 | 10.33  (1.67 - 79.80) | .01 | 1.44  (0.87 - 2.41) | .16 | 7.35  (1.44 - 41.37) | .016 | 1.44  (0.92 - 2.28) | .12 |
| **Adjuvant therapy** |  |  |  |  |  |  |  |  |  |  |  |  |  |  |  |  |
| Chemotherapy without trastuzumab | 1.00 (reference) |  | 1.00 (reference) |  | 1.00 (reference) |  | 1.00 (reference) |  | 1.00 (reference) |  | 1.00 (reference) |  | 1.00 (reference) |  | 1.00 (reference) |  |
| Chemotherapy with trastuzumab | 0.97  (0.15 - 3.96) | 0.97 | 0.37  (0.14 - 0.77) | .018 | 1.19  (0.17 - 5.30) | .83 | 0.34  (0.12 - 0.76) | .02 | 2.25  (0.29 - 13.95) | .381 | 0.27  (0.07 - 0.74) | 0.03 | 1.69  (0.22 - 9.45) | .56 | 0.334  (0.10 - 0.81) | .034 |

Abbreviations: HR, hormone receptor; HER2, human epidermal growth factor receptor 2; CI, confidence interval; HR, hazard ratio; *P* < 0.05 is statistically significant.
