# Supplementary material for: Novel Prognostic Stratification and Therapeutic Implications in T1N0M0 Breast Cancer: Insights from a Multi-Center Chinese Cohort
Source: Research Square preprint supplement (doi:10.21203/rs.3.rs-6348915/v1), 2025-05-09
Supplement: Supplementary file 2 [file cb8054077aa0eff90e4c739d.docx]

Table 2. Hazard Ratios Quantifying the Multivariate Associations between Patients, Tumor, and Treatment Characteristics and Breast Cancer Events in HR+HER2- (T<10 mm) Breast Cancer and HR+HER2- (≥10 mm) Breast Cancer.

|  | **DFS** | | | | **DRFS** | | | | **BCSS** | | | | **OS** | | | |
| --- | --- | --- | --- | --- | --- | --- | --- | --- | --- | --- | --- | --- | --- | --- | --- | --- |
| **Variables** | **＜10 mm** | | **≥10 mm** | | **＜10 mm** | | **≥10 mm** | | **＜10 mm** | | **≥10 mm** | | **＜10 mm** | | **≥10 mm** | |
|  | **HR**  **(95% CI)** | ***P*** | **HR**  **(95% CI)** | ***P*** | **HR (95%CI)** | ***P*** | **HR**  **(95% CI)** | ***P*** | **HR**  **(95% CI)** | ***P*** | **HR**  **(95% CI)** | ***P*** | **HR**  **(95% CI)** | ***P*** | **HR**  **(95% CI)** | ***P*** |
| **Age, years** |  |  |  |  |  |  |  |  |  |  |  |  |  |  |  |  |
| ≤ 60 | 1.00 (reference) |  | 1.00 (reference) |  | _ | _ | 1.00  (reference) |  | _ | _ | 1.00 (reference) |  | 1.00  (reference) |  | 1.00 (reference) |  |
| > 60 | 0.47  (0.07 - 2.21) | .37 | 0.57  (0.32 - 1.00) | .051 | _ | _ | 0.51  (0.25 - 1.02) | .06 | _ | _ | 0.57  (0.25 - 1.27) | .18 | 4.33  (0.90 - 27.01) | .08 | 2.72  (1.61 - 4.77) | <.001 |
| **Menopausal status** |  |  |  |  |  |  |  |  |  |  |  |  |  |  |  |  |
| Premenopause | 1.00 (reference) |  | 1.00 (reference) |  | _ | _ | 1.00 (reference) |  | _ | _ | 1.00 (reference) |  | 1.00  (reference) |  | 1.00 (reference) |  |
| Postmenopause | 1.48  (0.37 - 5.8) | .57 | 0.60  (0.39 - 0.89) | .014 | _ | _ | 0.52  (0.31 -0.83) | .008 | _ | _ | 0.45  (0.25 - 0.76) | .005 | 0.64  (0.07 - 6.08) | .680 | 0.52  (0.30 - 0.86) | .013 |
| **Histological grade** |  |  |  |  |  |  |  |  |  |  |  |  |  |  |  |  |
| other | 1.00 (reference) |  | 1.00 (reference) |  | _ | _ | 1.00  (reference) |  | _ | _ | 1.00 (reference) |  | 1.00  (reference) |  | 1.00 (reference) |  |
| III | 5.58  (1.55 - 18.71) | .01 | 2.53  (1.68 - 3.68) | .001 | _ | _ | 1.37  (0.78 - 2.28) | .24 | _ | _ | 1.52  (0.82 - 2.62) | .15 | 8.08  (2.13 - 33.99) | .002 | 1.19  (0.70 - 1.92) | 0.49 |
| **Adjuvant chemotherapy** |  |  |  |  |  |  |  |  |  |  |  |  |  |  |  |  |
| None | 1.00 (reference) |  | 1.00 (reference) |  | _ | _ | 1.00  (reference) |  | _ | _ | 1.00 (reference) |  | 1.00  (reference) |  | 1.00 (reference) |  |
| Done | 0.78  (0.19 - 3.85) | .74 | 0.27  (0.18 - 0.41) | <.001 | _ | _ | 0.28  (0.18 - 0.46) | <.001 | _ | _ | 0.26  (0.16 - 0.45) | <.001 | 0.24  (0.05 - 0.97) | .05 | 0.33  (0.22 - 0.52) | <.001 |
| **Adjuvant endocrine therapy** |  |  |  |  |  |  |  |  |  |  |  |  |  |  |  |  |
| None | 1.00 (reference) |  | 1.00 (reference) |  | _ | _ | 1.00  (reference) |  | _ | _ | 1.00 (reference) |  | 1.00  (reference) |  | 1.00 (reference) |  |
| Done | 0.53  (0.16 - 2.10) | .33 | 0.57  (0.39 - 0.84) | .003 | _ | _ | 0.63  (0.40 - 1.00) | .044 | _ | _ | 0.62  (0.38 - 1.04) | .06 | 0.29  (0.08 - 1.16) | .07 | 0.72  (0.48 - 1.11) | .12 |

Abbreviations: HR, hormone receptor; HER2, human epidermal growth factor receptor 2; CI, confidence interval; HR, hazard ratio; P < 0.05 is statistically significant.
